# Supplementary material for: Constant capacitance in nanopores of carbon monoliths
Source: Royal Society of Chemistry journal article supplement (doi:10.1039/c5cp01904d), 2015-01-01
Supplement: c5cp01904d1.pdf [file c5cp01904d1.pdf]

## Supplementary Information

### Constant capacitance in nanopores of carbon monoliths

Alejandra García-Gómez,<sup>a</sup> Gelines Moreno-Fernández,<sup>a</sup> Belén Lobato<sup>b</sup> and Teresa A. Centeno<sup>\*b</sup>

E-mail: [teresa@incar.csic.es](mailto:teresa@incar.csic.es)

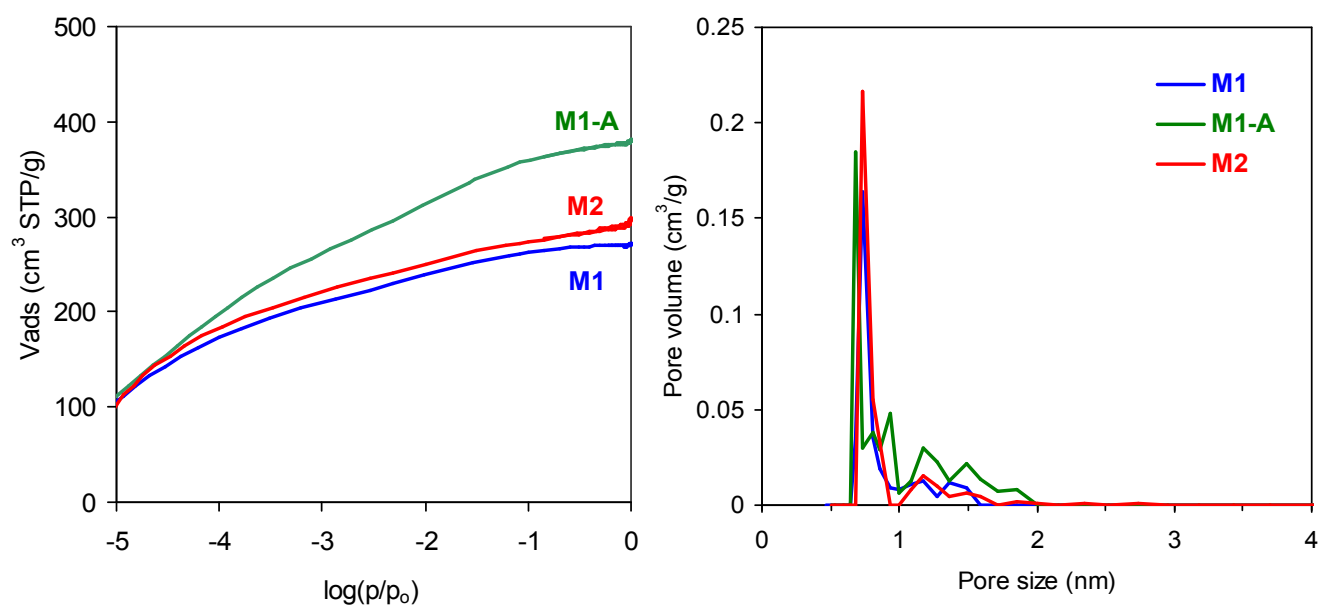

Fig. S1. Semi-logarithmic plots of the N<sub>2</sub> (77 K) isotherms (left) and NLDFT-pore size distributions (right) of the carbon monoliths.
